# Supplementary material for: Visible-light activation of peroxymonosulfate by NiCo2O4/Bi24O31Br10 to accelerate tetracycline degradation
Source: Royal Society of Chemistry journal article supplement (doi:10.1039/d0cy02245d), 2021-01-01
Supplement: d0cy02245d1.pdf [file d0cy02245d1.pdf]

## Supplementary Material

### Visible-light activation of peroxymonosulfate by $\text{NiCo}_2\text{O}_4/\text{Bi}_{24}\text{O}_{31}\text{Br}_{10}$ to accelerate tetracycline degradation performance

Yueyu Song<sup>ab</sup>, Jingjing Jiang<sup>ab</sup>, Yuhan Ma<sup>ab</sup>, Tianren Li<sup>ab</sup>, Shuangshi Dong<sup>ab\*</sup>

<sup>a</sup>Key Laboratory of Groundwater Resources and Environment (Jilin University),

Ministry of Education, Jilin University, Changchun, 130021, Jilin, China

<sup>b</sup>Jilin Provincial Key Laboratory of Water Resources and Environment, Jilin

University, Jilin University, Changchun, 130021, Jilin, China

**\* Corresponding Author.**

(S. Dong) Phone: +86 13604331853; Fax: +86 43188502606; E-mail:

[dongshuangshi@gmail.com](mailto:dongshuangshi@gmail.com)

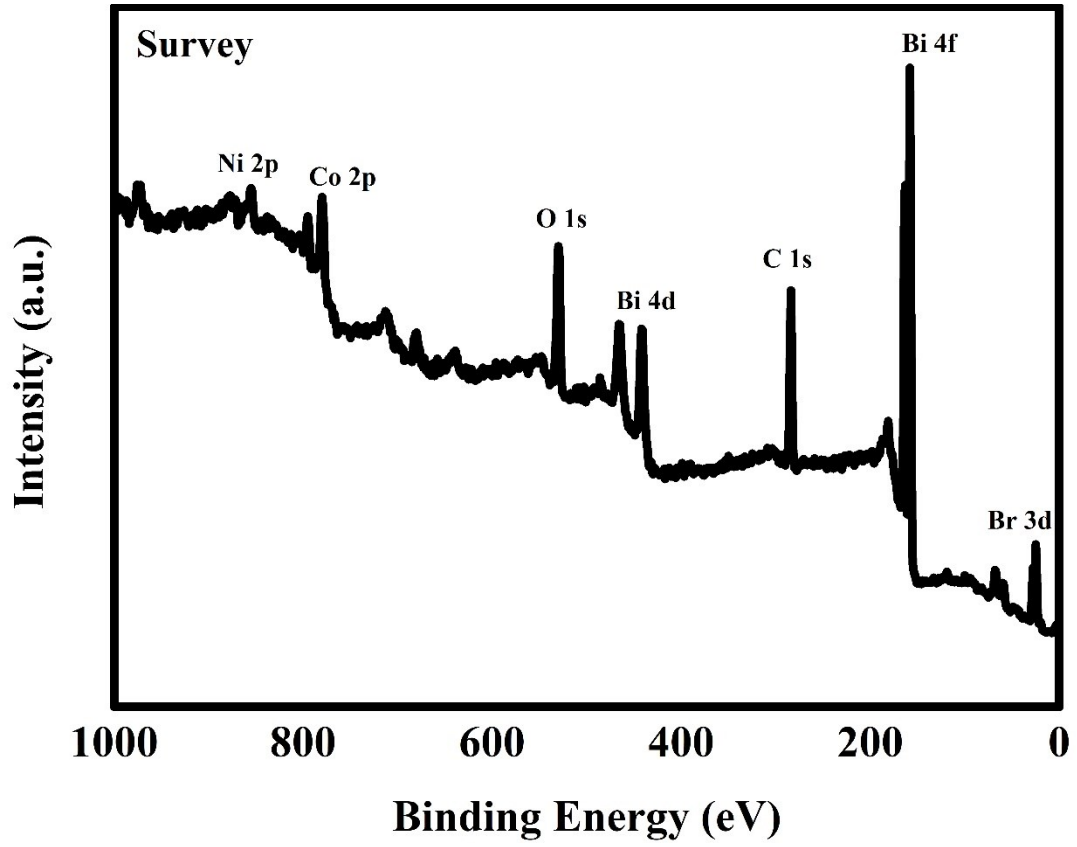

Fig. S1 The full XPS spectrum of 45% NiCo<sub>2</sub>O<sub>4</sub>/Bi<sub>24</sub>O<sub>31</sub>Br<sub>10</sub> composites

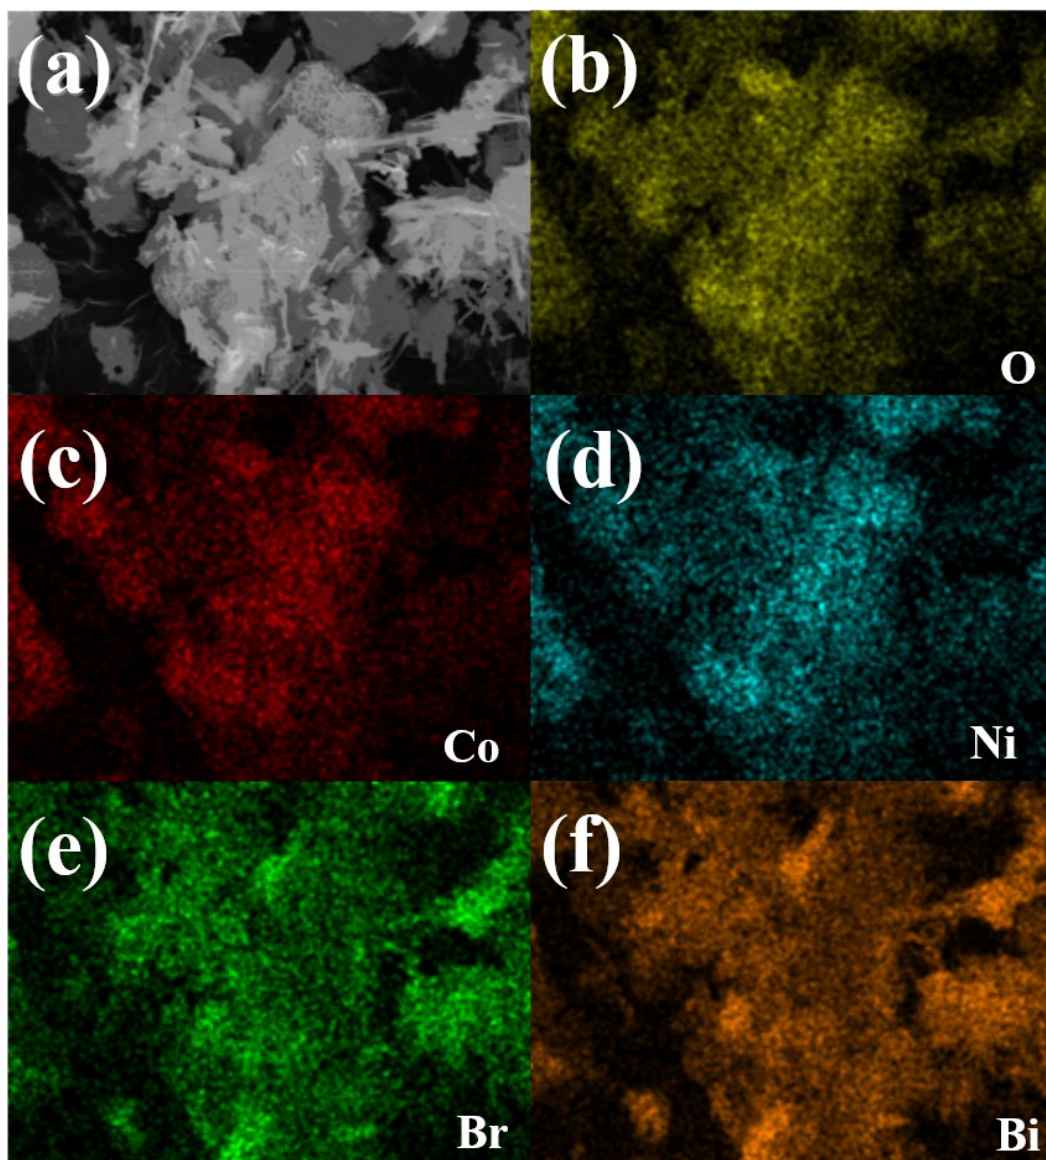

**Fig. S2 EDS elemental mapping of the 45% NiCo<sub>2</sub>O<sub>4</sub>/Bi<sub>24</sub>O<sub>31</sub>Br<sub>10</sub> composites**  
**Table S1. Comparison of diverse catalysts for TCH removal at 25°.**

| Catalyst                                                                            | TCH concentration (mg/L) | Catalyst conc. (mg/L) | Interaction time | Oxidant loading | TCH Removal (%) | Ref               |
|-------------------------------------------------------------------------------------|--------------------------|-----------------------|------------------|-----------------|-----------------|-------------------|
| NiCo <sub>2</sub> O <sub>4</sub> /Bi <sub>24</sub> O <sub>31</sub> Br <sub>10</sub> | 20                       | 40                    | 18 min           | PMS 1 mM        | 90.3%           | This study        |
| CoFeLa-LDH <sub>2</sub>                                                             | 30                       | 50                    | 10 min           | PMS 1 mM        | 81.6%-90.1%     | Li et al. (2020)  |
| Co <sub>3</sub> O <sub>4</sub> /g-C <sub>3</sub> N <sub>4</sub>                     | 20                       | 200                   | 60 min           | PMS 0.1 mM      | 90.2%           | Jin et al. (2020) |

|                                     |     |     |         |                |        |                       |
|-------------------------------------|-----|-----|---------|----------------|--------|-----------------------|
| Fe <sub>3</sub> O <sub>4</sub> -NCS | 20  | 200 | 90 min  | PMS<br>2.4mM   | 97.1%  | Yang et al.<br>(2021) |
| Fe-Ce-DIA                           | 50  | 100 | 120 min | PS 0.67<br>g/L | 80 %   | Lv et al.<br>(2020)   |
| Cu/BC700                            | 120 | 500 | 300 min | PS 300<br>mg/L | 47.4 % | Chen et al.<br>(2020) |

**Table S2. The calculated conduction band edge and valence band edges for NiCo<sub>2</sub>O<sub>4</sub> and Bi<sub>24</sub>O<sub>31</sub>Br<sub>10</sub>**

| Semiconductors                                    | Band edge energy<br>Eg/eV | Conduction band<br>edge (eV vs.NHE) | Valence band<br>edge<br>(eV vs.NHE) |
|---------------------------------------------------|---------------------------|-------------------------------------|-------------------------------------|
| Bi <sub>24</sub> O <sub>31</sub> Br <sub>10</sub> | 2.55                      | -1.02                               | +1.53                               |
| NiCo <sub>2</sub> O <sub>4</sub>                  | 1.53                      | -1.21                               | +0.32                               |

**Table S3. Comparison of ion leaching by different catalyst**

| Catalyst                                                                            | Co (II) Ion leaching (mg/L) | Ni (II) Ion leaching<br>(mg/L) | Reference             |
|-------------------------------------------------------------------------------------|-----------------------------|--------------------------------|-----------------------|
| NiCo <sub>2</sub> O <sub>4</sub> /Bi <sub>24</sub> O <sub>31</sub> Br <sub>10</sub> | 0.14                        | 0.13                           | This study            |
| NiCo <sub>2</sub> O <sub>4</sub> /g-C <sub>3</sub> N <sub>4</sub>                   | 8.2                         | 12.8                           | Jing et al.<br>(2020) |
| CoFe <sub>2</sub> O <sub>4</sub> @3DG                                               | 0.35                        | –                              | Li et al.<br>(2021)   |
| Co-NP                                                                               | 2.6                         | 2.5                            |                       |

|                                                                |      |      |                       |
|----------------------------------------------------------------|------|------|-----------------------|
| NiCo <sub>2</sub> O <sub>4</sub> -EG                           | 0.07 | 0.08 | Xu et al.<br>(2020)   |
| NiCo@NCNT                                                      | 0.18 | 0.13 | Zeng et al.<br>(2017) |
| Co <sub>3</sub> O <sub>4</sub> -Bi <sub>2</sub> O <sub>3</sub> | 0.21 | –    | Hu et al.<br>(2019)   |

**Table S4. The possible intermediates products of TCH degradation**

| Product | Structure<br>Fragment m/z | Possible Structure                                                                   | Molecular<br>formula                                          |
|---------|---------------------------|--------------------------------------------------------------------------------------|---------------------------------------------------------------|
| TCH     | 445                       | 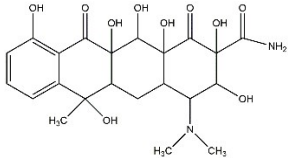   | C <sub>22</sub> H <sub>24</sub> N <sub>2</sub> O <sub>8</sub> |
| P1      | 465                       |   | C <sub>22</sub> H <sub>28</sub> N <sub>2</sub> O <sub>9</sub> |
| P2      | 437                       |  | C <sub>20</sub> H <sub>24</sub> N <sub>2</sub> O <sub>9</sub> |
| P3      | 392                       |  | C <sub>19</sub> H <sub>22</sub> NO <sub>8</sub>               |
| P4      | 359                       |  | C <sub>20</sub> H <sub>25</sub> NO <sub>5</sub>               |
| P5      | 324                       |  | C <sub>18</sub> H <sub>27</sub> NO <sub>4</sub>               |
| P6      | 279                       |  | C <sub>15</sub> H <sub>19</sub> O <sub>5</sub>                |

|     |     |                                                                                    |                   |
|-----|-----|------------------------------------------------------------------------------------|-------------------|
| P7  | 239 | 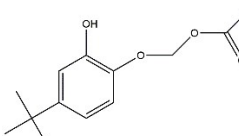 | $C_{13}H_{19}O_4$ |
| P8  | 220 |  | $C_{11}H_8O_5$    |
| P9  | 195 |  | $C_{10}H_{19}O_5$ |
| P10 | 124 |   | $C_8H_{12}O$      |
| P11 | 102 |   | $C_6H_{14}O$      |
| P12 | 90  |  | $C_5H_8O_2$       |

### Notes and references

1. J.J. Jiang, X.Y. Wang, C.J. Zhang, T.R. Li, Y.H. Lin, T.F. Xie, S.S. Dong, *Chem. Eng. J.* 2020, 397, 125356.
2. X.R. Li, Z.H. Liu, Y.J. Zhu, L. Song, Z.J. Dong, S. Niu, C. Lyu, *Sci Total Environ*, 2020, 749, 141466.
3. F. Liu, H.Y. Zhou, Z.C. Pan, Y. Liu, G. Yao, Y. Guo, B. Lai, *J. Hazard. Mater.*, 2020, 400, 123322.
4. M.J. Xu, H.Y. Zhou, Z.L. Wu, N.W. Li, Z.K. Xiong, G. Yao, B. Lai, *J. Hazard. Mater.*, 2020, 399, 123103.
5. L.M. Zeng, X.Z. Cui, L.S. Chen, T. Ye, W.M. Huang, R.G. Ma, X.H. Zhang, J.L. Shi, *Carbon*, 2017, 114, 347-355.
6. L.M. Hu, G.S. Zhang, M. Liu, Q. Wang, S.Y. Dong, P. Wang. 2019, *Sci.Total. Environ.*, 647, 352-361.
7. C.Y. Jin, M. Wang, Z.L. Li, J. Wang, Y. Zhao, J. Han, Z.M. Wu, *Chem. Eng. J.*, 2020, 398, 125569.
8. C.N. Lv, J.D. Shi, Q.J. Tang, Q. Hu, *MedSci*. 2020, 25, 5531.
9. J.H. Chen, X.L. Yu, C. Li, X. Tang, Y. Sun, *Chem. Eng. J.*, 2020, 382, 122916.
10. H.W. Yang, J. Zhou, E.X. Yang, H.X. Li, S.J. Wu, W. Yang, H. Wang, *Chemosphere*, 2021, 263, 128011.
11. X.G. Li, T.L. Hou, L.G. Yan, L.X. Shan, X. Meng, Y. X. Zhao, *J. Hazard. Mater.*,

2020, 398, 122884.
